# Supplementary material for: Infection prevention and ultrasound probe decontamination practices in Europe: a survey of the European Society of Radiology
Source: PubMed Central journal article supplement (PMC5110482; doi:10.1007/s13244-016-0528-z), 2016-10-24
Supplement: 13244_2016_528_MOESM1_ESM.pdf [file 13244_2016_528_MOESM1_ESM.pdf]

# Ultrasound (US) probe decontamination: Current practice

## General Information

**Thank you very much for having decided to take 5 minutes to complete our short survey!**

\* Country:

\* City:

\* Work place:

- Private centre
- Hospital
- Other (please specify):

\* Size of the hospital:

- no beds
- less than 100 beds
- 100-499 beds
- 500-1,000 beds
- more than 1,000 beds

\* Total number of US examinations per year:

- less than 3,000
- 3,000-10,000
- more than 10,000

\* Department:

- Radiology
- Gynaecology/Obstetrics
- Urology
- Cardiology
- Other (please specify):

\* Do you know of any cases of infection transmission through US procedures?

- no
- yes, please specify:

## Ultrasound (US) probe decontamination: Current practice

### Surface ultrasound on unbroken skin

#### Surface ultrasound on unbroken skin For example standard trans-abdominal ultrasound

\* Ultrasound gel used:

- Refill bottles
- Single use bottles
- Sterile gel sachets

\* Ordinary probe decontamination:

- Wipe off US gel and probe disinfection only at end of US list (not after each patient)
- Wipe off US gel, disinfection after each patient with foam/wipe
- Probe cleaning in dedicated washer
- Other (please specify):

If you know the name of the used product, please specify it here:

\* Infection control cases:

Which decontamination is performed?

- Wipe off US gel and disinfection with foam/wipe
- Probe cleaning in dedicated washer
- Other (please specify):

## Ultrasound (US) probe decontamination: Current practice

### Endo-cavity US probe decontamination

#### Endo-cavity US probe decontamination For example trans-vaginal or trans-rectal US

Do you use a probe cover at all times?

- yes
- no

US gel used inside probe cover:

- Refill bottles
- Single use bottles
- Sterile gel sachets

US gel used in direct patient contact:

- Refill bottles
- Single use bottles
- Sterile gel sachets

Probe decontamination:

- Wipe off US gel and probe disinfection only at end of US list (not after each patient)
- Wipe off US gel, disinfection after each patient with foam/wipe
- 3-Step deep cleaning process (for example Tristel wipes)
- Probe cleaning in dedicated washer
- Other (please specify):

If you know the name of the used product, please specify it here:

## Ultrasound (US) probe decontamination: Current practice

### Probe decontamination after interventional procedures

#### Probe decontamination after interventional procedures

**US probe in contact with patient body fluids like blood, for example US guided biopsies, intra-operative procedures**

\* Do you perform any interventional procedures?

- yes
- no

## Ultrasound (US) probe decontamination: Current practice

### Probe decontamination after interventional procedures

#### Probe decontamination after interventional procedures

#### US probe in contact with patient body fluids like blood, for example US guided biopsies, intra-operative procedures

\* Do you use a probe cover at all times?

yes

no

\* US gel used inside probe cover:

Refill bottles

Single use bottles

Sterile gel sachets

\* US gel used in direct patient contact:

Refill bottles

Single use bottles

Sterile gel sachets

\* Probe decontamination:

Wipe off US gel and probe disinfection only at end of US list (not after each patient)

Wipe off US gel, disinfection after each patient with foam/wipe

3-Step deep cleaning process (for example Tristel wipes)

Probe cleaning in dedicated washer

Other (please specify)

If you know the name of the used product, please specify it here:
